# Supplementary material
Source: Springer Nature journal article supplement (https://www.springermedizin.de/resource/supplementary/12974_2010_322_MOESM5_ESM.pdf/9601272)

**A***IL-10*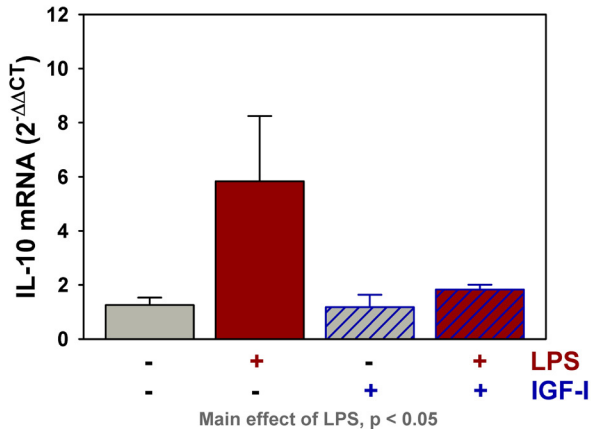**B***IL-4*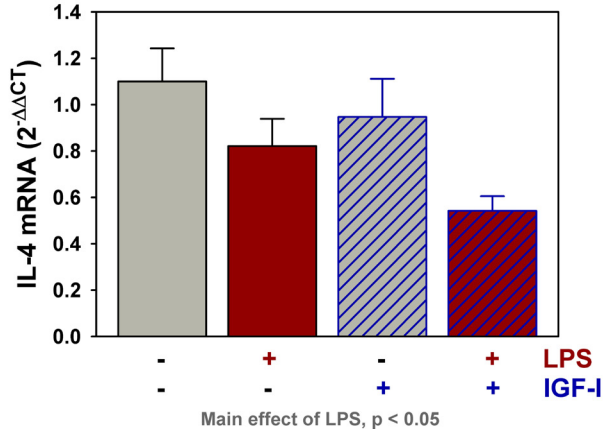

Supplement: MOESM5 [file 9601272]
